# Supplementary material for: H19 gene polymorphisms and neuroblastoma susceptibility in Chinese children: a six-center case-control study
Source: PubMed Central journal article supplement (PMC6856749; doi:10.7150/jca.37564), 2019-10-18
Supplement: jcav10p6358s1.pdf [file jcav10p6358s1.pdf]

**Supplemental Table 1.** Frequency distribution of selected characteristics in neuroblastoma cases and cancer-free controls

| Variables              | Combined subjects |       |                      |       | Hunan province   |       |                     |       | <i>P</i> <sup>a</sup> |
|------------------------|-------------------|-------|----------------------|-------|------------------|-------|---------------------|-------|-----------------------|
|                        | Cases<br>(n=700)  |       | Controls<br>(n=1516) |       | Cases<br>(n=162) |       | Controls<br>(n=270) |       |                       |
|                        | No.               | %     | No.                  | %     | No.              | %     | No.                 | %     |                       |
| Age range, month       | 0.00-132.00       |       | 0.004-156.00         |       | 0.033-130.00     |       | 0.033-101.00        |       | 0.322                 |
| Mean ± SD              | 33.17±28.14       |       | 30.67±25.20          |       | 34.56±30.30      |       | 27.81±19.83         |       |                       |
| ≤18                    | 274               | 39.14 | 615                  | 40.57 | 69               | 42.59 | 102                 | 37.78 |                       |
| >18                    | 426               | 60.86 | 901                  | 59.43 | 93               | 57.41 | 168                 | 62.22 |                       |
| Gender                 |                   |       |                      |       | 0.796            |       |                     |       | 0.842                 |
| Female                 | 307               | 43.86 | 656                  | 43.27 | 79               | 48.77 | 129                 | 47.78 |                       |
| Male                   | 393               | 56.14 | 860                  | 56.73 | 83               | 51.23 | 141                 | 52.22 |                       |
| INSS stages            |                   |       |                      |       |                  |       |                     |       |                       |
| I                      | 216               | 30.86 | /                    | /     | 48               | 29.63 | /                   | /     |                       |
| II                     | 129               | 18.43 | /                    | /     | 22               | 13.58 | /                   | /     |                       |
| III                    | 134               | 19.14 | /                    | /     | 54               | 33.33 | /                   | /     |                       |
| IV                     | 196               | 28.00 | /                    | /     | 37               | 22.84 | /                   | /     |                       |
| 4s                     | 16                | 2.29  | /                    | /     | 1                | 0.62  | /                   | /     |                       |
| NA                     | 9                 | 1.29  | /                    | /     | /                | /     | /                   | /     |                       |
| Sites of origin        |                   |       |                      |       |                  |       |                     |       |                       |
| Adrenal gland          | 215               | 30.71 | /                    | /     | 31               | 19.14 | /                   | /     |                       |
| Retroperitoneal region | 240               | 34.29 | /                    | /     | 78               | 48.15 | /                   | /     |                       |
| Mediastinum            | 177               | 25.29 | /                    | /     | 36               | 22.22 | /                   | /     |                       |
| Other region           | 60                | 8.57  | /                    | /     | 17               | 10.49 | /                   | /     |                       |
| NA                     | 8                 | 1.14  |                      |       | /                | /     | /                   | /     |                       |

SD, standard deviation; NA, not available.

<sup>a</sup> Two-sided  $\chi^2$  test comparing distributions between neuroblastoma cases and cancer-free controls.

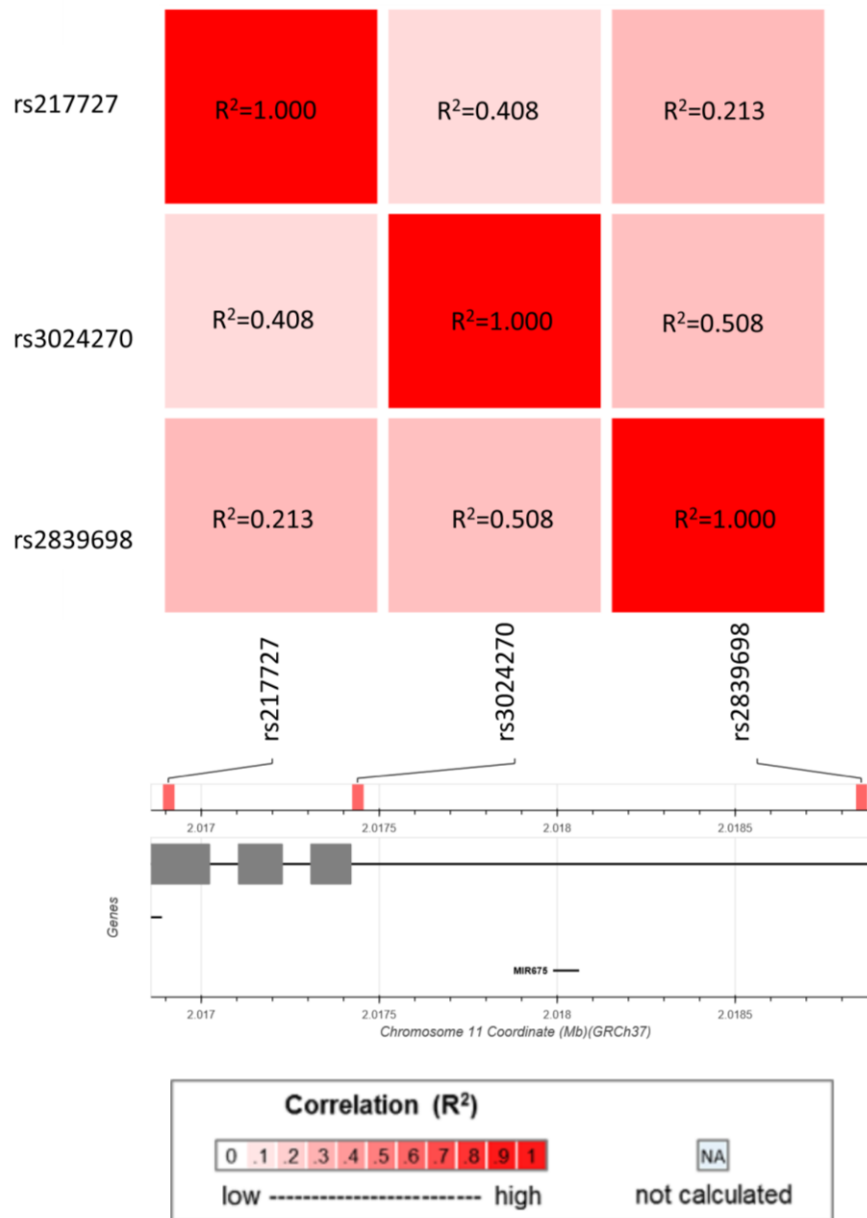

**Supplementary Figure 1.** Linkage disequilibrium (LD) analysis for the three selected SNPs in Chinese Han population consisting of CHB (Han Chinese in Beijing, China) and CHS (Southern Han Chinese) subjects. LD as R<sup>2</sup> for SNP pairs is shown inside the squares.
